# Supplementary material
Source: ML conference proceedings conference paper supplement (https://openaccess.thecvf.com/content/ICCV2025/html/Zhang_RoBridge_A_Hierarchical_ICCV_2025_paper.html)
Supplement: Supplementary file 1 [file Zhang_RoBridge_A_Hierarchical_ICCV_2025_supplemental.pdf]

# RoBridge: A Hierarchical Architecture Bridging Cognition and Execution for General Robotic Manipulation

## Supplementary Material

### SUMMARY OF THE APPENDIX

This appendix contains additional details for this paper. The appendix is organized as follows:

- §A provides **Limitations** of our work.
- §B provides **Experiment Details**.
- §C shows more **Visualization**.

### A. Limitations

RoBridge still presents opportunities for further improvement. As a hierarchical framework, it is susceptible to the performance of any individual module. Enhancements in the visual understanding capabilities of the high-level planning module and improvements in the precision of execution in the low-level control module could significantly boost RoBridge’s overall performance. Furthermore, while currently limited to manipulating objects with simple shapes, RoBridge could be extended to handle a wider variety of shapes in the future, including soft or tiny objects.

### B. Experiment Details

#### B.1. Primitive Actions

The detailed definitions of primitive actions are shown in Table 1.

Table 1. The list of primitive actions and their description.

| Action | Description                                                         |
|--------|---------------------------------------------------------------------|
| grasp  | Securely hold an object to control its position.                    |
| place  | Put an object at a specific location.                               |
| press  | Apply force to an object to activate or transform it.               |
| push   | Exert force on an object to move it away from a specific direction. |
| pull   | Apply force to draw an object closer from a specific direction.     |
| open   | Adjust an object to allow access or exposure.                       |
| close  | Adjust an object to restrict access or seal it.                     |
| turn   | Rotate an object to change its orientation.                         |
| reach  | Approach an object or a designated location.                        |

#### B.2. Training Details

In our experiments on MetaWorld, we conducted training for 1M steps, with failure data sampling occurring every 100k steps. We added the RL training curve. As shown in Figure 1, most tasks can be trained in 200k timesteps. The success rate of  $\pi_e$  in the training scenario is 90.8%. During real-world experiments, we fine-tuned the model for 2k steps. We will resize the image to  $168 \times 168$  and feed it to GEA for faster speed. Training  $\pi_e$  and  $\pi_g$  on an A100 GPU took 25 and 30 GPU

hours, respectively. Finetuning on real data took just 1 GPU hour. Inference needs 6 GB GPU memory (except GPT-4o). Only GEA and Track-Anything run every frame, taking 60-80ms. VLM and SAM+GroundingDINO only run in the first frame of each primitive action, with VLM at 0.3s and SAM+GroundingDINO at 1s per run.

#### B.3. Robosuite Benchmark Results

Robosuite encompasses a suite of contact-rich robotic manipulation tasks, emphasizing high-fidelity rendering and realistic physical control. This environment allows us to evaluate the potential effectiveness of our approach in real-world scenarios. Table 2 shows the results of Robosuite, RoBridge achieved the highest success rates in all cases, indicating that our method is also effective for tasks involving contact-rich interactions.

#### B.4. MetaWorld Benchmark Results

We show in detail the specific success rate of our method on MT50 (the 50 tasks of the metaworld) in the Table 3.

### C. Visualization

#### C.1. DINOv2 Visualization

We conducted an in-depth analysis of why DINOv2 performs poorly as a feature extractor. By visualizing DINOv2’s attention areas, as shown in Figure 2, we found that it predominantly focuses on common objects, such as drawers, and does not pay much attention to robotic arms or small objects. It only partially attends to slightly more prominent objects, like buttons, or when a robotic arm is near a drawer. Therefore, it is not well-suited for robotic manipulation tasks.

#### C.2. Results

We show more demonstrations of real-world experiments in the Figure 3.

#### C.3. Failure Case Analysis

This section investigates the causes of failure in the operation of RoBridge. Our findings indicate that the majority of failures are attributable to the loss of masks due to occlusion or overlap, as well as positional deviations during execution. Fortunately, we observed that RoBridge is capable of correcting errors to a certain extent. As illustrated in Figure 4, when the task failed during the attempt to grasp the second block, RoBridge was able to replan and successfully complete the task on the second attempt.

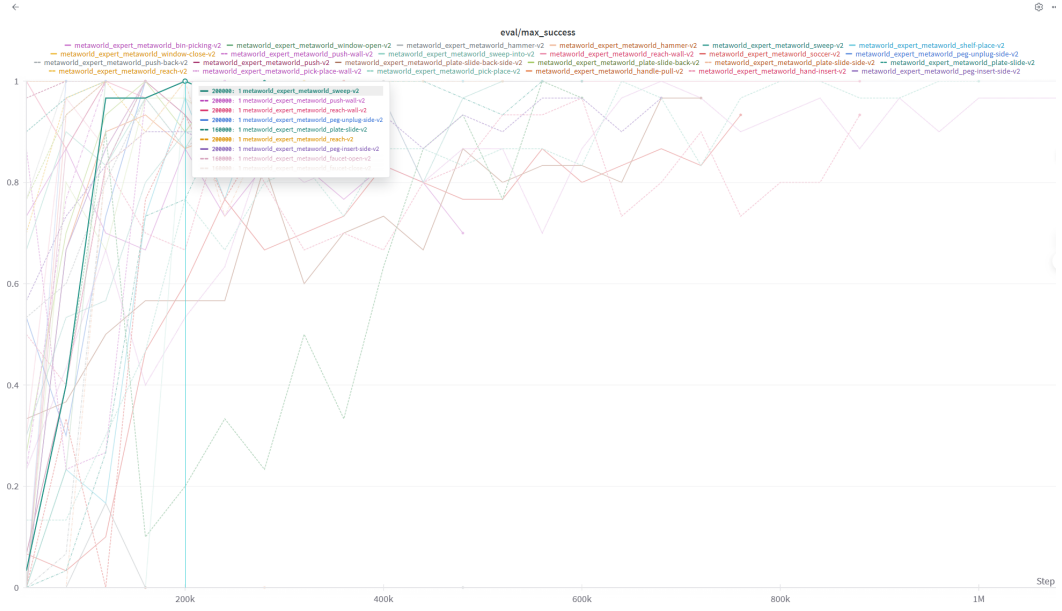

Figure 1. RL training details.

Table 2. Robosuite Benchmark Results(%).

| Model    | RS-Bread | RS-Can | RS-Milk | RS-Cereal | RS-NutRound | RS-NutSquare | Mean |
|----------|----------|--------|---------|-----------|-------------|--------------|------|
| DRQ-v2   | 52       | 32     | 2       | 0         | 6           | 2            | 15.7 |
| RAPS     | 0        | 0      | 0       | 0         | 0           | 0            | 0    |
| TAMP     | 90       | 100    | 85      | 100       | 40          | 35           | 75   |
| SayCan   | 93       | 100    | 90      | 63        | 56          | 27           | 71.5 |
| PSL      | 100      | 100    | 100     | 100       | 98          | 97           | 99.2 |
| RoBridge | 100      | 100    | 100     | 100       | 100         | 100          | 100  |

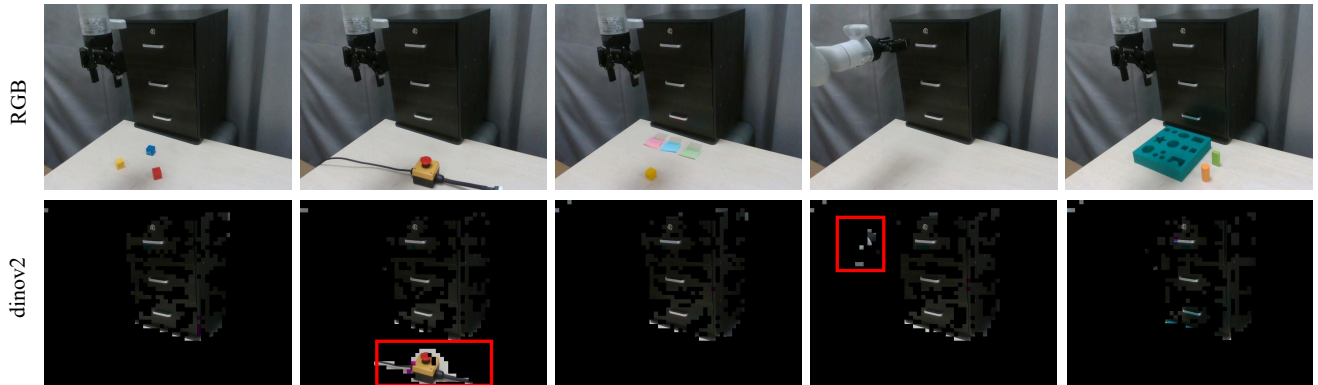

Figure 2. Feature visualization of DINOv2.

Table 3. Detail Results of Metaworld Tasks. Each task is tested 10 times.

| Task                     | Success     | Task                      | Success | Task                  | Success |
|--------------------------|-------------|---------------------------|---------|-----------------------|---------|
| assembly                 | 10          | button-press-topdown      | 10      | door-unlock           | 10      |
| basketball               | 0           | button-press-topdown-wall | 8       | hand-insert           | 10      |
| bin-picking              | 9           | button-press              | 10      | drawer-close          | 10      |
| box-close                | 5           | button-press-wall         | 10      | drawer-open           | 10      |
| coffee-button            | 10          | coffee-pull               | 10      | faucet-open           | 10      |
| coffee-push              | 10          | dial-turn                 | 9       | faucet-close          | 10      |
| disassemble              | 6           | door-close                | 10      | hammer                | 2       |
| door-lock                | 8           | door-open                 | 10      | handle-press-side     | 10      |
| handle-press             | 10          | handle-pull-side          | 5       | handle-pull           | 10      |
| lever-pull               | 2           | peg-insert-side           | 9       | pick-place-wall       | 10      |
| pick-out-of-hole         | 5           | reach                     | 10      | push-back             | 10      |
| push                     | 7           | pick-place                | 10      | plate-slide           | 9       |
| plate-slide-side         | 9           | plate-slide-back          | 8       | plate-slide-back-side | 9       |
| peg-unplug-side          | 9           | soccer                    | 7       | stick-push            | 8       |
| stick-pull               | 8           | push-wall                 | 10      | reach-wall            | 10      |
| shelf-place              | 9           | sweep-into                | 10      | sweep                 | 7       |
| window-open              | 10          | window-close              | 10      |                       |         |
| <b>Mean Success Rate</b> | <b>85.4</b> |                           |         |                       |         |

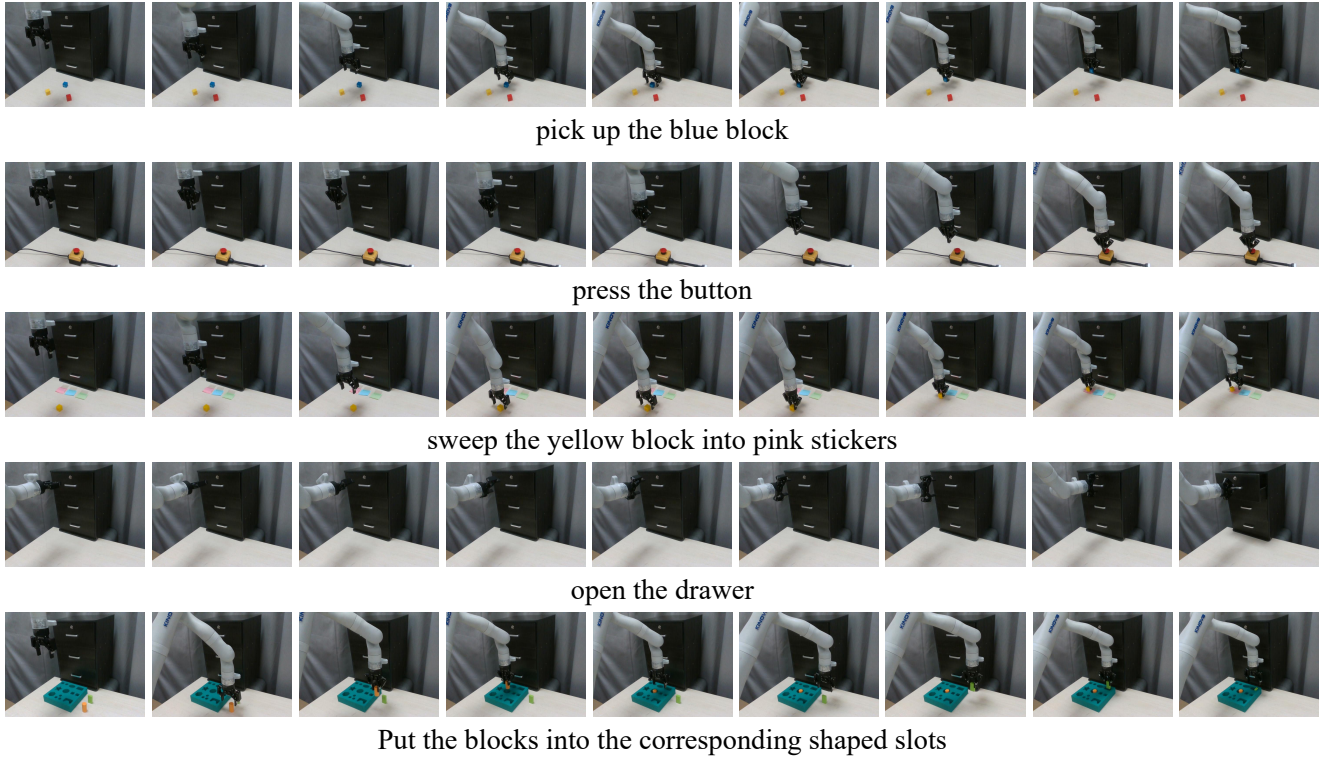

Figure 3. Demonstrations of real-world experiments.

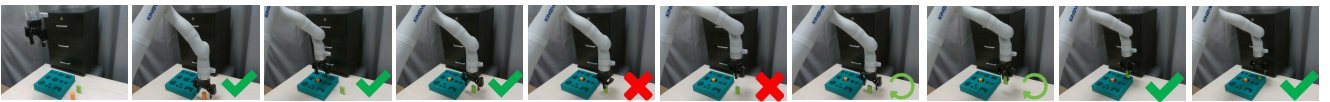

Figure 4. A demonstration shows how RoBridge recovers from failure. When it fails, it re-plans and executes.
